# Supplementary material for: Effects of Resin Chemistries on the Selective Removal of Industrially Relevant Metal Ions Using Wafer-Enhanced Electrodeionization
Source: PubMed Central journal article supplement (PMC7827004; doi:10.3390/membranes11010045), 2021-01-09
Supplement: membranes-11-00045-s001.pdf [file membranes-11-00045-s001.pdf]

# Supplementary Materials: Effects of Resin Chemistries on the Selective Removal of Industrially Relevant Metal Ions Using Wafer-Enhanced Electrodeionization

Humeyra B. Ulusoy Erol, Christa N. Hestekin, and Jamie A. Hestekin \*

Supplementary Table S1: FTIR sulfonic acid functional group peak intensity values for strong cation exchange resins alone and incorporated into wafers

| Wavelength (cm <sup>-1</sup> ) | IR 120 Na <sup>+</sup> resin | IR 120 Na <sup>+</sup> wafer B1 mid | IR 120 Na <sup>+</sup> wafer B2 mid | IR 120 Na <sup>+</sup> wafer B2 edge | IRP 69 resin | IRP 69 wafer |
|--------------------------------|------------------------------|-------------------------------------|-------------------------------------|--------------------------------------|--------------|--------------|
| 1173                           | 0.3435                       | 0.0254                              | 0.0181                              | 0.1062                               | 0.2431       | 0.1643       |
| 1126                           | 0.3110                       | 0.0243                              | 0.0288                              | 0.1032                               | 0.2172       | 0.1531       |
| 1036                           | 0.3222                       | 0.0266                              | 0.0430                              | 0.1118                               | 0.2221       | 0.1633       |
| 1008                           | 0.3205                       | 0.0263                              | 0.0379                              | 0.1112                               | 0.2218       | 0.1629       |

B1 = batch 1, B2 = batch 2, mid = middle of wafer

Supplementary Table S2: FTIR carboxylic acid functional group peak intensity values for weak cation exchange resins alone and incorporated into wafers

| Wavelength (cm <sup>-1</sup> ) | Dowex MAC 3 H <sup>+</sup> resin | Dowex MAC 3 H <sup>+</sup> wafer B1 mid | Dowex MAC 3 H <sup>+</sup> wafer B2 mid | Dowex MAC 3 H <sup>+</sup> wafer B2 edge | CG 50 resin | CG 50 wafer |
|--------------------------------|----------------------------------|-----------------------------------------|-----------------------------------------|------------------------------------------|-------------|-------------|
| 1760 - 1690                    | 0.2463                           | 0.0260                                  | 0.0406                                  | 0.0340                                   | 0.0504      | 0.0713      |
| 1320 - 1210                    | 0.1742                           | 0.0198                                  | 0.0314                                  | 0.0287                                   | 0.0315      | 0.0496      |

B1 = batch 1, B2 = batch 2, mid = middle of wafer
